# Supplementary material for: Public access to protocols of contemporary cancer randomized clinical trials
Source: Springer Nature journal article supplement (doi:10.1186/s13063-021-05382-7), 2021-06-27
Supplement: MOESM1 [file 19297336]

### **Additional File 1**

PubMed Search Query:

(cancer[Title] OR leukemia[Title] OR lymphoma[Title] OR carcinoma[Title] OR melanoma[Title] OR sarcoma[Title] OR tumor[Title] OR tumour[Title] OR glioma[Title] OR glioblastoma[Title] OR astrocytoma[Title] OR oligodendroglioma[Title] OR brain metastases[Title] OR adenocarcinoma[Title] OR metastases[Title]) AND (Phase III[Title/abstract] OR Phase 3[Title/abstract] OR clinical trial[Title/abstract] OR trial[Title/abstract] OR randomized[Title/abstract] OR randomized[Title/abstract] OR randomised[Title/abstract] OR randomly[Title/abstract]) AND ("2020/01/01"[Date - Publication] : "2020/01/31"[Date - Publication])
