# Supplementary material for: Public access to protocols of contemporary cancer randomized clinical trials
Source: Springer Nature journal article supplement (doi:10.1186/s13063-021-05382-7), 2021-06-27
Supplement: MOESM2 [file 19297336]

**Additional File 2.**

Journal and Protocol Availability Status for All Included Trials.

| <b>PMID</b> | <b>Journal</b>                           | <b>Protocol Available<br/>(Y or N)</b> |
|-------------|------------------------------------------|----------------------------------------|
| 31995683    | New England Journal of<br>Medicine       | Y                                      |
| 31790344    | Journal of Clinical Oncology             | Y                                      |
| 31806543    | Lancet Oncology                          | Y                                      |
| 31411950    | Journal of Clinical Oncology             | Y                                      |
| 31944221    | JAMA Oncology                            | Y                                      |
| 31839281    | Lancet                                   | N                                      |
| 31980913    | Cancer Immunology,<br>Immunotherapy      | N                                      |
| 31037378    | Supportive Care in Cancer                | N                                      |
| 31785463    | European Journal of Cancer               | N                                      |
| 31767473    | Radiotherapy and Oncology                | Y                                      |
| 31976786    | Journal of Clinical Oncology             | Y                                      |
| 31918233    | European Journal of Cancer               | Y                                      |
| 31901705    | European Journal of Cancer               | Y                                      |
| 31995688    | New England Journal of<br>Medicine       | Y                                      |
| 31776726    | Annals of Hematology                     | Y                                      |
| 31935026    | JAMA                                     | Y                                      |
| 31879945    | British Journal of<br>Haematology        | Y                                      |
| 31924316    | European Urology                         | N                                      |
| 31958446    | CHEST                                    | N                                      |
| 31756547    | International Journal of<br>Surgery      | N                                      |
| 31830347    | Oral Diseases                            | N                                      |
| 31810797    | Lancet Oncology                          | Y                                      |
| 31936897    | Cancers                                  | Y                                      |
| 31001692    | Supportive Care in Cancer                | N                                      |
| 30998526    | European Journal of Cancer<br>Prevention | N                                      |
| 31418073    | Supportive Care in Cancer                | N                                      |
| 31950156    | Neurosurgery                             | N                                      |
| 31571329    | European Journal of Cancer<br>Care       | N                                      |
| 31804876    | Journal of Clinical Oncology             | Y                                      |
| 31794324    | Journal of Clinical Oncology             | Y                                      |
| 31605312    | Breast Cancer Research and<br>Treatment  | N                                      |
| 31853892    | Der Urologe                              | N                                      |

|          |                                                                |   |
|----------|----------------------------------------------------------------|---|
| 31921608 | Avicenna Journal of Phytomedicine                              | N |
| 31971403 | Health Psychology                                              | N |
| 32002556 | Neuro-Oncology                                                 | N |
| 31706052 | Bone                                                           | N |
| 31985125 | The Oncologist                                                 | N |
| 31983177 | Asian Pacific Journal of Cancer Prevention                     | N |
| 31869461 | British Journal of Surgery                                     | N |
| 31725196 | Cancer Medicine                                                | N |
| 31954884 | World Neurosurgery                                             | N |
| 31948296 | Journal of Investigative Surgery                               | N |
| 31940376 | PloS One                                                       | N |
| 31685429 | Oral Surgery, Oral Medicine, Oral Pathology and Oral Radiology | N |
| 31932108 | Gynecologic Oncology                                           | N |
| 31526964 | Nutrition                                                      | N |
| 31496287 | Nutrition and Cancer                                           | N |
| 31785830 | Radiotherapy and Oncology                                      | Y |
| 31903689 | Head and Neck                                                  | Y |
| 31600414 | Psychooncology                                                 | N |
| 32003822 | JAMA Network Open                                              | Y |
| 31769226 | Cancer Medicine                                                | N |
| 32037284 | Clinical Nutrition                                             | Y |
| 31781890 | Archives of Gynecology and Obstetrics                          | N |
| 31753727 | Lancet Oncology                                                | Y |
| 31956347 | Journal of Cancer                                              | N |
| 31701267 | Supportive Care in Cancer                                      | Y |
| 32090630 | Integrative Cancer Therapies                                   | Y |
| 31788995 | Journal of Gynecologic Oncology                                | N |
| 31785451 | Oral Oncology                                                  | N |
| 31093677 | Journal of the National Cancer Institute                       | N |
| 31659822 | Psychooncology                                                 | Y |
| 31968063 | JAMA Surgery                                                   | Y |
| 31385041 | Surgery Today                                                  | N |
| 31906751 | Journal of Investigative Surgery                               | N |
| 31908102 | European Journal of Cancer Care                                | N |

|          |                                                                                               |   |
|----------|-----------------------------------------------------------------------------------------------|---|
| 31728618 | Journal of Cancer Research and Clinical Oncology                                              | N |
| 31381147 | International Journal of Cancer                                                               | N |
| 31097634 | Haematologica                                                                                 | N |
| 31666284 | Cancer Epidemiology, Biomarkers & Prevention                                                  | N |
| 31352797 | Nutrition and Cancer                                                                          | N |
| 31924332 | Gynecologic Oncology                                                                          | N |
| 31291710 | Cancer Research and Treatment                                                                 | Y |
| 31912784 | Annals of Oncology                                                                            | Y |
| 31189338 | Psychology & Health                                                                           | N |
| 31961463 | BJOG                                                                                          | N |
| 31455085 | American Journal of Health Promotion                                                          | N |
| 31402072 | Journal of European Society of Surgical Oncology and the British Journal of Surgical Oncology | Y |
| 31805025 | Cancer Nursing                                                                                | N |
| 31999946 | Lancet Oncology                                                                               | N |
| 31997146 | Journal of Cancer Education                                                                   | N |
| 31838009 | Lancet Oncology                                                                               | Y |
| 31760314 | European Journal of Cancer                                                                    | N |
| 31903600 | British Journal of Surgery                                                                    | N |
| 31898309 | International Journal of Behavioral Medicine                                                  | Y |
| 31595627 | Psychooncology                                                                                | Y |
| 31931269 | European Journal of Cancer                                                                    | N |
| 31615934 | Clinical Cancer Research                                                                      | N |
| 31838561 | Cancer, Chemotherapy, and Pharmacology                                                        | N |
| 31892574 | Anticancer Research                                                                           | N |
| 31975316 | Breast Cancer Research and Treatment                                                          | N |
| 31962198 | European Journal of Cancer                                                                    | N |
| 31982605 | Journal of Pain and Symptom Management                                                        | N |
| 31953483 | Prostate Cancer & Prostatic Diseases                                                          | N |
| 32001530 | Haematologica                                                                                 | N |
| 31627177 | International Journal of Radiation Oncology                                                   | N |

|          |                                                                          |   |
|----------|--------------------------------------------------------------------------|---|
| 32013277 | Official Journal of the Association of Pain Management Anesthesiologists | Y |
| 31907662 | Surgical Endoscopy: Ultrasound and Interventional Techniques             | N |
| 32007834 | Growth Hormone & IGF Research                                            | Y |
| 31990759 | American Journal of Clinical Oncology: Cancer Clinical Trials            | N |
| 30982092 | Supportive Care in Cancer                                                | Y |
| 31993719 | Osteoporosis International                                               | Y |
| 31593756 | International Journal of Radiation Oncology, Biology, Physics            | Y |
| 31670173 | International Journal of Nursing Studies                                 | N |
| 31605663 | BJU International                                                        | N |
| 31937614 | Clinical Cancer Research                                                 | Y |
| 31978815 | The Breast                                                               | N |
| 31806540 | Lancet Oncology                                                          | Y |
| 31999296 | JAMA Oncology                                                            | Y |
| 31907649 | Supportive Care in Cancer                                                | N |
| 32055717 | Clinical and Translational Radiation Oncology                            | Y |
| 31173341 | International Journal of Cancer                                          | N |
| 31235074 | The American Journal of Surgery                                          | N |
| 31953725 | Surgical Endoscopy: Ultrasound and Interventional Techniques             | N |
| 31570566 | Clinical Cancer Research                                                 | N |
| 31804894 | Journal of Clinical Oncology                                             | Y |
| 32000167 | American Journal of Clinical Oncology                                    | N |
| 31791552 | Gynecologic Oncology                                                     | Y |
| 31900761 | Quality of Life Research                                                 | Y |
| 31912800 | Annals of Oncology                                                       | N |
| 31838010 | Lancet Oncology                                                          | Y |
| 31953188 | Gastrointestinal Endoscopy                                               | N |
| 31724334 | Cancer Medicine                                                          | N |
| 31903657 | Head & Neck                                                              | N |

|          |                                      |   |
|----------|--------------------------------------|---|
| 31995035 | Kardiologia polska                   | N |
| 32089455 | Clinical Colorectal Cancer           | N |
| 31726490 | Thoracic Cancer                      | N |
| 31968595 | Nutrients                            | Y |
| 31682542 | Journal of Clinical Oncology         | Y |
| 31953696 | Breast Cancer Research and Treatment | N |
| 31955002 | Lung Cancer                          | N |
| 31812890 | Lung Cancer                          | Y |
